# Supplementary material for: Development and Validation of Multiple Equations for Low-Density Lipoprotein and Apolipoprotein B in Korean Patients Visiting Local Clinics and Hospitals
Source: MDPI journal article supplement (doi:10.3390/nu15122786), 2023-06-17
Supplement: s1 [file s1]

**Supplementary Table S1.** Comparison of calculated LDL-C Levels with directly measured LDL-C in the Validating Set 1 (n=133,316)

| Comparison and equations                 |              | Data                    |
|------------------------------------------|--------------|-------------------------|
| Systemic differences, mg/dL <sup>1</sup> | Mean (SD)    | 95% confidence interval |
| LDL-C_Sampson/NIH                        | -4.3 (7.83)  | -4.34 to -4.26          |
| LDL-C_Friedewald                         | -8.0 (10.02) | -8.01 to -7.90          |
| LDL-C_Martin/Hopkins                     | -3.7 (7.88)  | -3.70 to -3.61          |
| LDL-C_Choi                               | 9.5 (7.59)   | 9.44 to 9.52            |
| Systemic differences, % <sup>2</sup>     | Mean (SD)    | 95% CI                  |
| LDL-C_Sampson/NIH                        | -4.1 (9.32)  | -4.12 to -4.02          |
| LDL-C_Friedewald                         | -8.0 (13.35) | -8.10 to -7.96          |
| LDL-C_Martin/Hopkins                     | -3.0 (10.31) | -3.01 to -2.90          |
| LDL-C_Choi                               | 9.76 (10.83) | 9.70 to 9.82            |
| Absolute percentage error, %             | Median       | 95%CI                   |
| LDL-C_Sampson/NIH                        | 4.9          | 4.82 to 4.88            |
| LDL-C_Friedewald                         | 6.5          | 6.48 to 6.57            |
| LDL-C_Martin/Hopkins                     | 5.0          | 5.00 to 5.06            |
| LDL-C_Choi                               | 8.9          | 8.80 to 8.89            |

<sup>1</sup> calculated LDL-C minus directly measured LDL-C. <sup>2</sup> calculated LDL-C minus directly measured LDL-C) / directly measured x 100

**Supplementary Table S2.** Comparison of calculated LDL-C levels with directly measured LDL-C in Validating Set 2nd (n=1376)

| Comparison and equations                 | Data          |                         |
|------------------------------------------|---------------|-------------------------|
| Systemic differences, mg/dL <sup>1</sup> | Mean (SD)     | 95% confidence interval |
| LDL-C_Sampson/NIH                        | -5.0 (7.95)   | -5.42 to -4.58          |
| LDL-C_Friedewald                         | -8.6 (10.02)  | -9.15 to -8.09          |
| LDL-C_Martin/Hopkins                     | -4.7 (8.25)   | -5.09 to -4.22          |
| LDL-C_Choi                               | 8.9 (7.86)    | 8.50 to 9.33            |
| ApoB LDL-CEq_Sampson/NIH                 | -9.0 (18.03)  | -9.97 to -8.06          |
| ApoB LDL-CEq_Friedewald                  | -12.7 (18.10) | -13.63 to -11.72        |
| ApoB LDL-CEq_Martin/Hopkins              | -8.0 (18.01)  | -8.93 to -7.02          |
| ApoB LDL-CEq_Choi                        | 5.1 (18.15)   | 4.10 to 6.02            |
| ApoB LDL-CEq_Cole_Sampson/NIH            | -8.1 (18.12)  | -9.06 to -7.14          |
| ApoB LDL-CEq_Cole_Friedewald             | -10.8 (18.12) | -11.77 to -9.86         |
| ApoB LDL-CEq_Cole_Martin/Hopkins         | -8.6 (18.03)  | -9.60 to -7.69          |
| Systemic differences, % <sup>2</sup>     | Mean (SD)     | 95% confidence interval |
| LDL-C_Sampson/NIH                        | -4.9 (8.18)   | -5.32 to -4.46          |
| LDL-C_Friedewald                         | -9.0 (12.90)  | -9.64 to -8.28          |
| LDL-C_Martin/Hopkins                     | -3.9 (8.95)   | -4.33 to -3.38          |
| LDL-C_Choi                               | 9.27 (9.66)   | 8.76 to 9.78            |
| ApoB LDL-CEq_Sampson/NIH                 | -7.1 (16.81)  | -8.01 to -6.23          |
| ApoB LDL-CEq_Friedewald                  | -11.3 (16.99) | -12.21 to -10.42        |
| ApoB LDL-CEq_Martin/Hopkins              | -5.7 (16.80)  | -6.61 to -4.84          |
| ApoB LDL-CEq_Choi                        | 7.0 (18.92)   | 6.03 to 8.03            |
| ApoB LDL-CEq_Cole_Sampson/NIH            | -6.5 (17.10)  | -7.43 to -5.6           |
| ApoB LDL-CEq_Cole_Friedewald             | -9.4 (17.03)  | -10.31 to -8.51         |
| ApoB LDL-CEq_Cole_Martin/Hopkins         | -6.7 (16.84)  | -7.58 to -5.80          |
| Absolute percentage error, %             | Median        | 95% confidence interval |
| LDL-C_Sampson/NIH                        | 5.3           | 4.92 to 5.66            |
| LDL-C_Friedewald                         | 7.0           | 6.48 to 7.45            |
| LDL-C_Martin/Hopkins                     | 5.6           | 5.20 to 6.00            |
| LDL-C_Choi                               | 8.4           | 7.90 to 8.86            |
| ApoB LDL-CEq_Sampson/NIH                 | 11.9          | 11.11 to 12.66          |
| ApoB LDL-CEq_Friedewald                  | 14.1          | 13.23 to 14.99          |
| ApoB LDL-CEq_Martin/Hopkins              | 11.0          | 10.53 to 11.90          |
| ApoB LDL-CEq_Choi                        | 10.3          | 9.57 to 11.10           |
| ApoB LDL-CEq_Cole_Sampson/NIH            | 11.6          | 10.84 to 12.28          |
| ApoB LDL-CEq_Cole_Friedewald             | 13.1          | 12.34 to 13.84          |
| ApoB LDL-CEq_Cole_Martin/Hopkins         | 11.6          | 10.87 to 12.36          |

<sup>1</sup> calculated LDL-C minus directly measured LDL-C. <sup>2</sup> calculated LDL-C minus directly measured LDL-C) / directly measured x 100
